# Supplementary material for: Entangled iodine and hydrogen peroxide formation in ice
Source: Royal Society of Chemistry journal article supplement (doi:10.1039/d0cp02966a), 2020-01-01
Supplement: d0cp02966a1.pdf [file d0cp02966a1.pdf]

## Electronic Supplementary Information

### Entangled Iodine and Hydrogen Peroxide Formation in Ice

Yong Su Baek,<sup>a</sup> Kitae Kim,<sup>\*bc</sup> Alfonso Saiz-Lopez,<sup>d</sup> Dae Wi Min,<sup>e</sup> Bomi Kim,<sup>bc</sup> Wonyong Choi<sup>e</sup> and Cheol Ho Choi<sup>\*a</sup>

<sup>a</sup> Department of Chemistry and Green-Nano Materials Research Center, College of Natural Sciences, Kyungpook National University, Sangyeok, Bukgu, Daegu 41566, South Korea

<sup>b</sup> Korea Polar Research Institute (KOPRI), Incheon 21990, South Korea

<sup>c</sup> Department of Polar Sciences, University of Science and Technology (UST), Incheon 21990, South Korea

<sup>d</sup> Department of Atmospheric Chemistry and Climate, Institute of Physical Chemistry Rocasolano, CSIC, 28006 Madrid, Spain

<sup>e</sup> Division of Environmental Science and Engineering, Pohang University of Science and Technology (POSTECH), Pohang 37673, South Korea

### Contents

Figures SI 1 and 2

Tables SI 1-4

References for Supplementary information

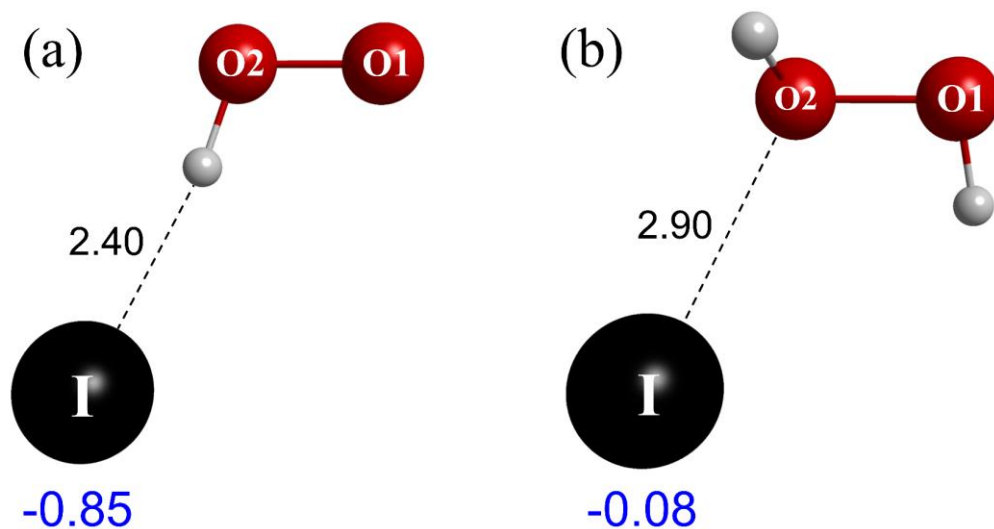

**Fig. SI 1** The optimized structures of (a)  $\text{IO}_2\text{H}^-$  and (b)  $\text{IO}_2\text{H}_2$  complexes calculated using B3LYP/MIXED-level theory. The bond lengths (black) are in Å, while the Mulliken atomic charges (blue) are in atomic units. The binding energy between  $\text{I}^-$  and  $\text{O}_2\text{H}$  radical is  $-18.7$  kcal/mol, while the binding energy between  $\text{I}^-$  and  $\text{H}_2\text{O}_2$  is  $-3.5$  kcal/mol. Weak charge transfer is indicated in (a), while complete transfer occurs in (b). The MIXED basis set was composed of the Stevens-Krauss (SBKJC) VDZ effective core potential basis set for I and the standard cc-pVTZ basis set for O and H.

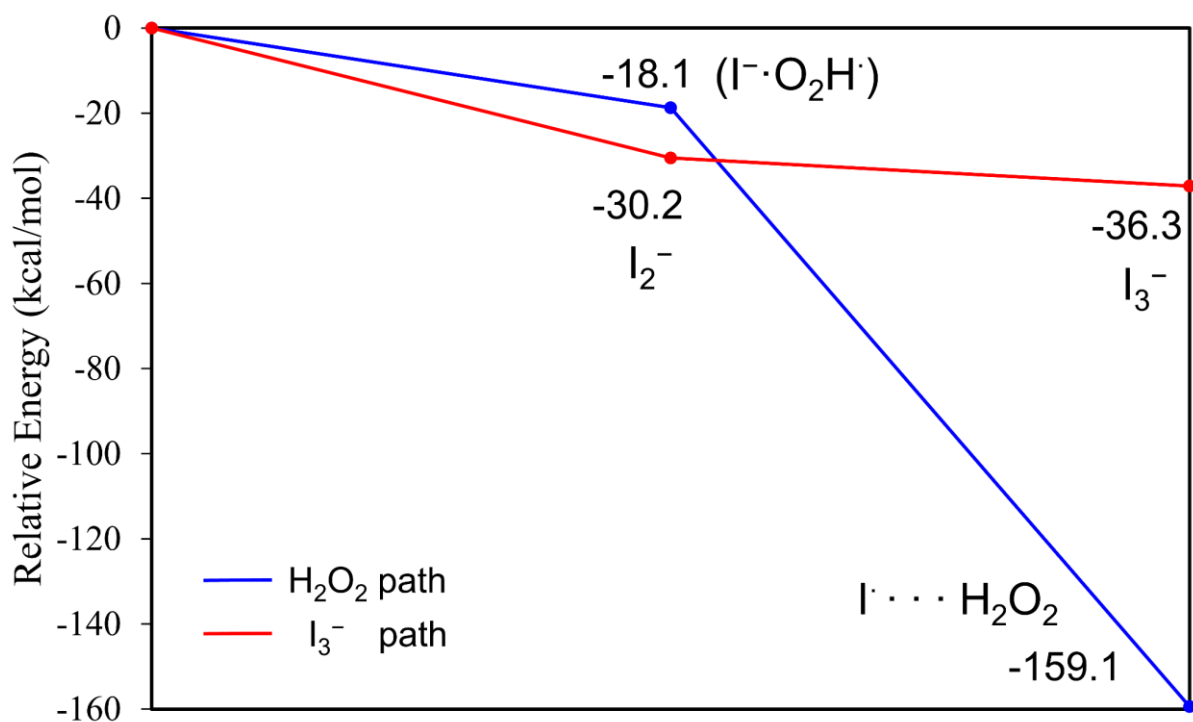

**Fig. SI 2** Relative changes in energy along the  $I\cdot \rightarrow I_2^- \rightarrow I_3^-$  (red) and  $O_2H\cdot \rightarrow IO_2H^- \rightarrow I\cdot \dots H_2O_2$  (blue) pathways calculated using B3LYP/MIXED-level theory. The corresponding reaction enthalpies are presented in Table SI 1d–g. The MIXED basis set was composed of the Stevens-Krauss (SBKJC) VDZ effective core potential basis set for I and the standard cc-pVTZ basis set for O and H.

**Table SI 1.** The enthalpies of various elementary reactions calculated using B3LYP/MIXED-level theory, including zero-point energies. **a**, Formation of  $\Gamma \cdot \text{O}_2$  complexes in the singlet and triplet states. **b**, Formation of  $\text{IO}_2\text{H}$  complexes in the singlet and triplet states through protonation by hydronium at low pH. **c**, Formation of  $\text{IO}_2\text{H}$  complexes in the singlet and triplet states at neutral pH in water. **d**, Formation of  $\text{I}_2^-$  in the doublet state. **e**, Formation of  $\text{I}_3^-$  in the singlet state. **f**, Formation of  $\text{IO}_2\text{H}^-$  in the doublet state. **g**, Formation of  $\text{IO}_2\text{H}_2$  in the doublet state at low pH with hydronium ion. **h**, Dissociation of  $\text{IO}_2\text{H}_2$  to  $\Gamma$  and  $\text{H}_2\text{O}_2$ . The MIXED basis set was composed of the Stevens-Krauss (SBKJJC) VDZ effective core potential basis set for I and the standard cc-pVTZ basis set for O and H.

| Elementary reactions                                                                                      | Singlet                   | Triplet                   |
|-----------------------------------------------------------------------------------------------------------|---------------------------|---------------------------|
| (a) $\Gamma^- + \text{O}_2 \rightarrow \Gamma \cdot \text{O}_2$                                           | -5.1* (0.3 <sup>a</sup> ) | 0.2* (-0.3 <sup>a</sup> ) |
| (b) $\Gamma \cdot \text{O}_2 + \text{H}_3\text{O}^+ \rightarrow \text{IO}_2\text{H} + \text{H}_2\text{O}$ | -170.7                    | -127.7                    |
| (c) $\Gamma \cdot \text{O}_2 + \text{H}_2\text{O} \rightarrow \text{IO}_2\text{H} + \text{OH}^-$          | 74.8                      | 117.8                     |
| (d) $\text{I} \cdot + \Gamma^- \rightarrow \text{I}_2^-$                                                  | -30.2 <sup>b</sup>        |                           |
| (e) $\text{I}_2^- + \text{I}_2^- \rightarrow \text{I}_3^- + \Gamma^-$                                     | -6.1 <sup>b</sup>         |                           |
| (f) $\Gamma^- + \text{O}_2\text{H} \cdot \rightarrow \text{IO}_2\text{H}^-$                               | -18.1 <sup>b</sup>        |                           |
| (g) $\text{IO}_2\text{H}^- + \text{H}_3\text{O}^+ \rightarrow \text{IO}_2\text{H}_2 + \text{H}_2\text{O}$ | -141.0 <sup>b</sup>       |                           |
| (h) $\text{IO}_2\text{H}_2 \rightarrow \text{I} \cdot + \text{H}_2\text{O}_2$                             | 2.8 <sup>b</sup>          |                           |

\*The  $\Gamma \cdot \text{O}_2$  structures were obtained using CASSCF(12,7)/MIXED-level theory. <sup>a</sup>Values were obtained with MCQDPT2(12,7)/MIXED, not including zero-point energy. <sup>b</sup>The spin states of  $\text{I} \cdot$ ,  $\Gamma^-$ ,  $\text{I}_2^-$ ,  $\text{I}_3^-$ ,  $\text{O}_2\text{H} \cdot$ ,  $\Gamma \cdot \text{O}_2\text{H} \cdot$ ,  $\text{IO}_2\text{H}_2$  and  $\text{H}_2\text{O}_2$  are doublet, singlet, doublet, singlet, doublet, doublet, doublet and singlet, respectively.

**Table SI 2.** The singlet and triplet excitation energies of the  $\Gamma \cdot \text{O}_2$  complex calculated using MCQDPT2(12,7)/MIXED-level theory. The optimized structures of the  $\Gamma \cdot \text{O}_2$  complex were obtained using CASSCF(12,7)/MIXED-level theory. Experimentally observed absorption from 280 to 330 nm did not correspond well to the theoretical excitation energies of the  $\Gamma \cdot \text{O}_2$  complex. The MIXED basis set was composed of the Stevens-Krauss (SBKJC) VDZ effective core potential basis set for I and the standard cc-pVTZ basis set for O and H. The values are shown in nm.

|                | Singlet |                | Triplet |
|----------------|---------|----------------|---------|
| S <sub>1</sub> | 309,960 | T <sub>1</sub> | 517     |
| S <sub>2</sub> | 1675    | T <sub>2</sub> | 510     |
| S <sub>3</sub> | 932     | T <sub>3</sub> | 173     |
| S <sub>4</sub> | 843     | T <sub>4</sub> | 172     |
| S <sub>5</sub> | 226     | T <sub>5</sub> | 169     |

**Table SI 3.** Values in the TD-DFT/B3LYP column correspond to the excitation energies of IO<sub>2</sub>H in the singlet and triplet states. Values were calculated using TDDFT/B3LYP/MIXED at the optimized geometries. The oscillator strengths are shown in parentheses. Values in the MCQDPT2 column were obtained using the MCQDPT2(20,12)/MIXED-level theory for singlets and the MCQDPT2(12,7)/MIXED-level theory for triplets. The IO<sub>2</sub>H singlet geometry was obtained with CASSCF(20,12)/MIXED, and the IO<sub>2</sub>H triplet geometry was obtained with CASSCF(12,7)/MIXED. Experimentally observed absorption from 280 to 330 nm corresponded well to the singlet S<sub>3</sub> and S<sub>4</sub> states according to the TDDFT and MCQDPT2 theories. The MIXED basis set was composed of the Stevens-Krauss (SBKJC) VDZ effective core potential basis set for I and the standard cc-pVTZ basis set for O and H. The values are shown in nm.

|                | TD-DFT/B3LYP | MCQDPT2 | Expt.     |
|----------------|--------------|---------|-----------|
| Singlet        |              |         |           |
| S <sub>1</sub> | 502 (0.001)  | 544     |           |
| S <sub>2</sub> | 387 (0.002)  | 437     |           |
| S <sub>3</sub> | 291 (0.005)  | 328     | 280 ~ 330 |
| S <sub>4</sub> | 260 (0.221)  | 308     | 280 ~ 330 |
| S <sub>5</sub> | 194 (0.004)  | 278     |           |
| Triplet        |              |         |           |
| T <sub>1</sub> | 1016 (0.000) | 41328   |           |
| T <sub>2</sub> | 1008 (0.000) | 1252    |           |
| T <sub>3</sub> | 892 (0.000)  | 574     |           |
| T <sub>4</sub> | 832 (0.002)  | 546     |           |
| T <sub>5</sub> | 742 (0.000)  | 541     |           |

|       |             |     |
|-------|-------------|-----|
| $T_6$ | 639 (0.000) | 238 |
| $T_7$ | 633 (0.003) | 220 |
| $T_8$ | 215 (0.000) | 219 |
| $T_9$ | 195 (0.837) | 135 |

**Table SI 4.** Correlations between iodine concentration [I] (Fig. 4a) in an ice core from the east coast of Greenland (71° 30' N, 26° 72' W)<sup>1</sup> and hydrogen peroxide concentrations in ice cores from central Greenland, [H<sub>2</sub>O<sub>2</sub>]<sub>A</sub> (72° 34' N, 37° 38' W), and south Greenland, [H<sub>2</sub>O<sub>2</sub>]<sub>B</sub> (65° 11' N, 43° 49' W)<sup>2</sup> from 1773 to 1986 (Fig. 4b). Correlations between H<sub>2</sub>O<sub>2</sub> concentrations and ozone [O<sub>3</sub>] (Fig. 4c) over the North Atlantic (20° N–70° N, 75° W–0°)<sup>1</sup> and their significance are shown below. [I], [H<sub>2</sub>O<sub>2</sub>]<sub>A</sub> and [H<sub>2</sub>O<sub>2</sub>]<sub>B</sub> reflect data from 1950 to 1986.  $\rho$  is the Pearson's correlation coefficient, while significance is denoted by 'Sig.'

|           | [I]-[H <sub>2</sub> O <sub>2</sub> ] <sub>A</sub> | [I]-[H <sub>2</sub> O <sub>2</sub> ] <sub>B</sub>               | [H <sub>2</sub> O <sub>2</sub> ] <sub>A</sub> -[H <sub>2</sub> O <sub>2</sub> ] <sub>B</sub> |
|-----------|---------------------------------------------------|-----------------------------------------------------------------|----------------------------------------------------------------------------------------------|
| 1773-1986 |                                                   |                                                                 |                                                                                              |
| $\rho$    | 0.164                                             | 0.218                                                           | 0.371                                                                                        |
| Sig.      | 0.028                                             | 0.003                                                           | 0.000                                                                                        |
|           | [O <sub>3</sub> ]-[I]                             | [O <sub>3</sub> ]-[H <sub>2</sub> O <sub>2</sub> ] <sub>A</sub> | [O <sub>3</sub> ] <sub>A</sub> -[H <sub>2</sub> O <sub>2</sub> ] <sub>B</sub>                |
| 1950-1986 |                                                   |                                                                 |                                                                                              |
| $\rho$    | 0.420                                             | 0.406                                                           | 0.519                                                                                        |
| Sig.      | 0.011                                             | 0.014                                                           | 0.001                                                                                        |



## Supplementary References

1. C. A. Cuevas, N. Maffezzoli, J. P. Corella, A. Spolaor, P. Vallelonga, H. A. Kjær, M. Simonsen, M. Winstrup, B. Vinther, C. Horvat, R. P. Fernandez, D. Kinnison, J.-F. Lamarque, C. Barbante and A. Saiz-Lopez, *Nat. Commun.*, 2018, 9, 1–6.
2. A. Sigg and A. Neftel, *Nature*, 1991, **351**, 557–559.
